# Supplementary material
Source: HighWire-hosted journal article supplement (https://www.highwirestage.com/highwire/filestream/102996/field_highwire_adjunct_files/0/0365.pdf)
Supplement: 0365.pdf [file 0365.pdf]

## Appendix

### SURVEY Workload Data

Time Frame – please respond to these questions reflecting on the most recent academic year (July 1, 2021 to June 2022) unless otherwise specified.

Q1. What is your institution?

Q2. How many working faculty?

Q3. How many open positions?

Q4. What is the break down of the studies your division reads?

\_\_\_\_\_ % radiographs  
\_\_\_\_\_ % CT  
\_\_\_\_\_ % MR  
\_\_\_\_\_ % US  
\_\_\_\_\_ % Nuclear medicine  
\_\_\_\_\_ % Fluoroscopy  
\_\_\_\_\_ % PET-CT  
\_\_\_\_\_ % PET-MR

Q5. Does your division do interventional procedures and what % ?

\_\_\_\_\_ No  
\_\_\_\_\_ Yes \_\_\_\_\_ % of total volume  
(the sum of the percent reported for Q2 and Q3 should be 100%)

Q6. If you did procedures, please indicate which ones:

\_\_\_\_ Lumbar punctures  
\_\_\_\_ Myelograms  
\_\_\_\_ CSF leak  
\_\_\_\_ Nerve Root injections  
\_\_\_\_ Vertebral augmentation  
\_\_\_\_ Head and neck biopsies- ultrasound guided  
\_\_\_\_ Head and neck biopsies-CT guided  
\_\_\_\_ Cerebral Angiography-diagnostic  
\_\_\_\_ Cerebral Angiography-interventional  
\_\_\_\_ Other

Q7. What % of the imaging studies are interpreted with and without trainees?

\_\_\_\_\_ % without trainees  
\_\_\_\_\_ % with Junior Trainees (first or second year residents)  
\_\_\_\_\_ % with Senior Trainees (third or fourth years residents or fellows)

Q8. What is your estimate of a number of cross-sectional studies (CT and MRI) a neuroradiology faculty can reasonably and safely read in a regular full clinical day (defined as a standard shift, not call, not evening, not moonlight), considering the time taken for answering calls from technologists and clinicians? (this is not the number of studies you are currently reading but rather the number of studies you would like to read every day if you were appropriately staffed)

\_\_\_\_\_ of CT/MRIs if read alone without trainee

\_\_\_\_\_ of CT/MRIs if read with junior trainee (take into account time to teach)

\_\_\_\_\_ of CT/MRIs if read with senior trainee (take into account time to teach)

Q9. Which statement best characterizes your impression of your division's workload?

- a. Well below capacity (you read a lot fewer studies than the number answered in Q7)
- b. Below capacity (you read fewer studies than the number answered in Q7)
- c. At capacity (you read exactly the number of studies answered in Q7)
- d. Above capacity (you read more studies than the number answered in Q7)
- e. Well above capacity (you read a lot more studies than the number answered in Q7)
